# Supplementary material for: Source Attribution of Salmonella in Macadamia Nuts to Animal and Environmental Reservoirs in Queensland, Australia
Source: PubMed Central journal article supplement — Foodborne Pathog Dis. 2020 May 7;17(5):357–64. doi: 10.1089/fpd.2019.2706 (PMC7232652; doi:10.1089/fpd.2019.2706), 2020-05-07
Supplement: Supp_FigS3.pdf [file Supp_FigS3.pdf]

Distribution of *Salmonella* types in macadamia nuts and sources of interest per time period

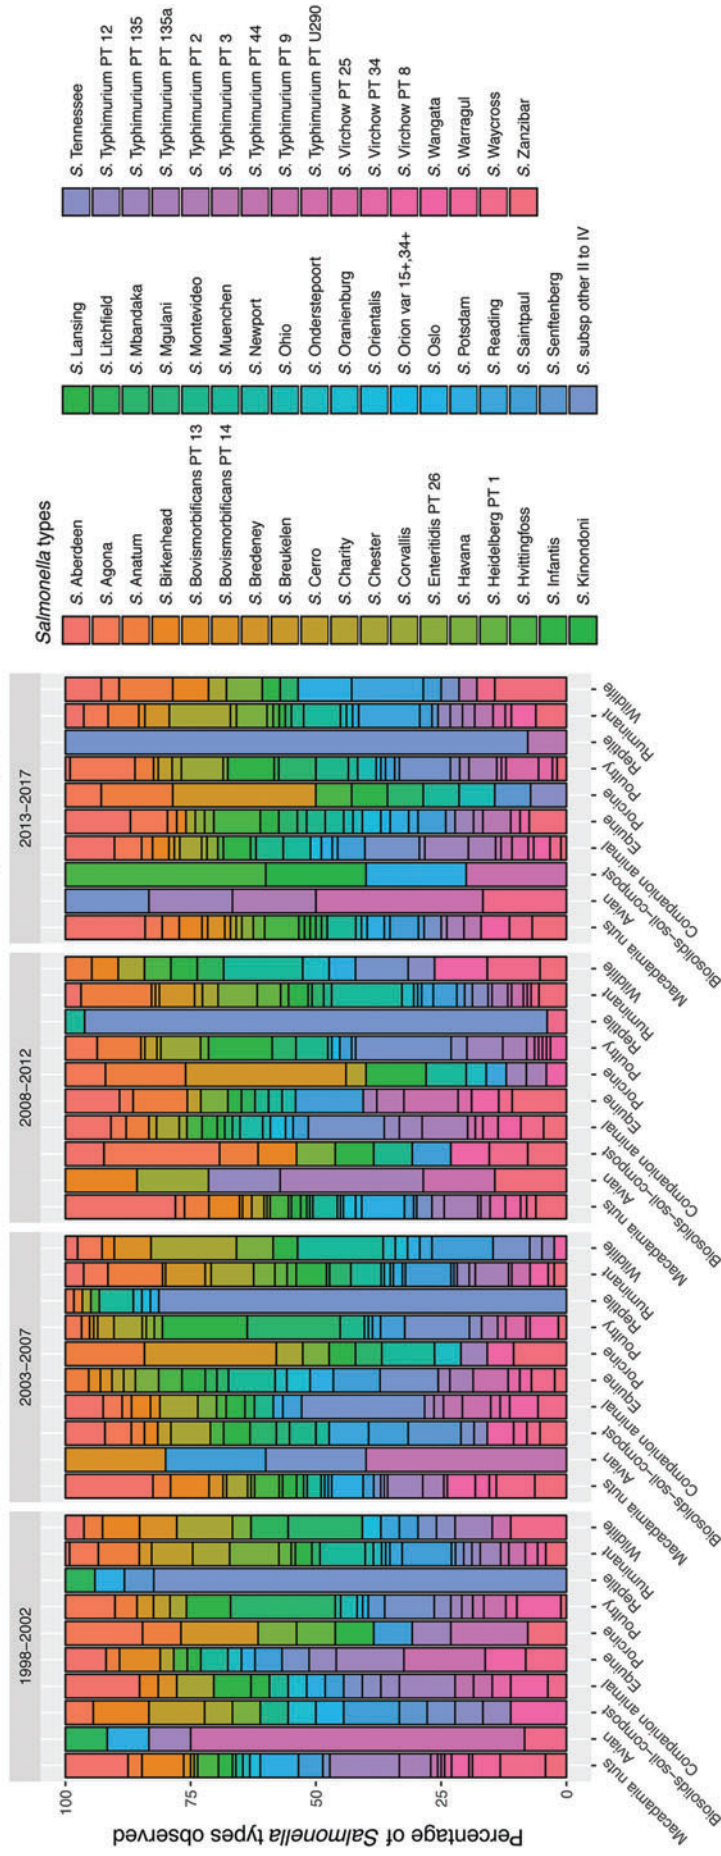

Macadamia nuts, animal and environmental sources

**SUPPLEMENTARY FIG. S3.** The distribution pattern of *Salmonella* types in macadamia nuts and the nine sources of interest observed in the different 5-year time periods. A percentage of the 52 different *Salmonella* types are stacked along the y-axis for each source for each 5-year time period. Every *Salmonella* type is found on macadamia nuts in each 5-year time period, but not necessarily in each of the nine sources.
