# Supplementary material for: Source Attribution of Salmonella in Macadamia Nuts to Animal and Environmental Reservoirs in Queensland, Australia
Source: PubMed Central journal article supplement — Foodborne Pathog Dis. 2020 May 7;17(5):357–64. doi: 10.1089/fpd.2019.2706 (PMC7232652; doi:10.1089/fpd.2019.2706), 2020-05-07
Supplement: Supp_FigS4.pdf [file Supp_FigS4.pdf]

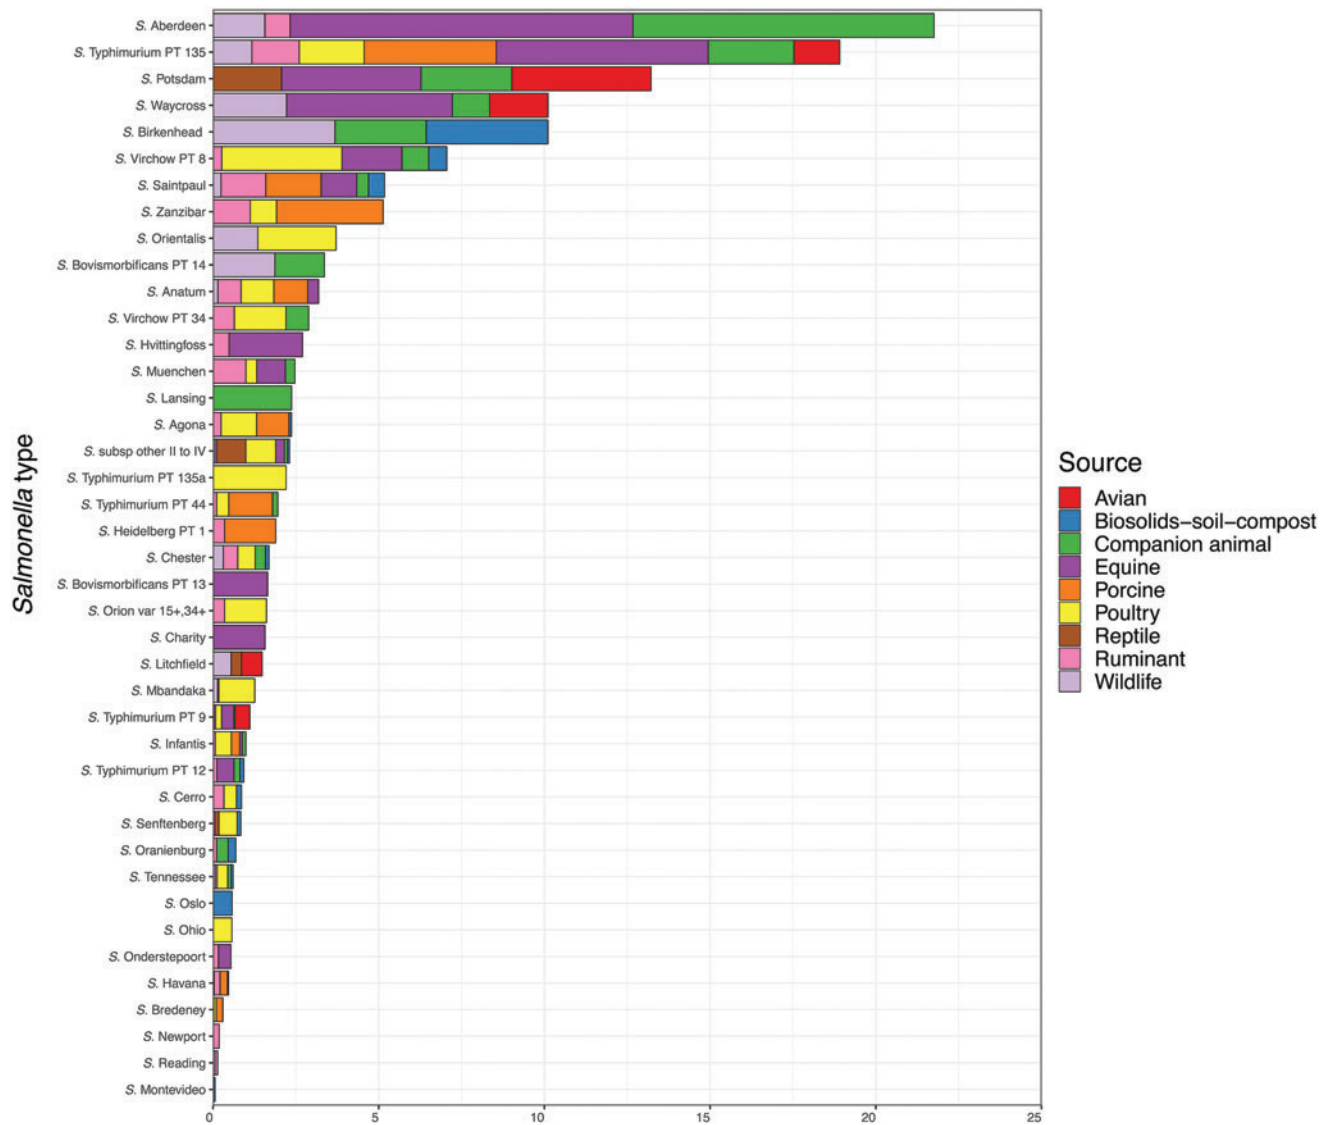

**SUPPLEMENTARY FIG. S4a.** *Salmonella* types isolated from macadamia nuts and attributed to sources for the time period 1998–2002 by the *Salmonella* type and time model (model 2). *Salmonella* types sorted after decreasing mean number with the largest at the top (*Salmonella* Aberdeen).

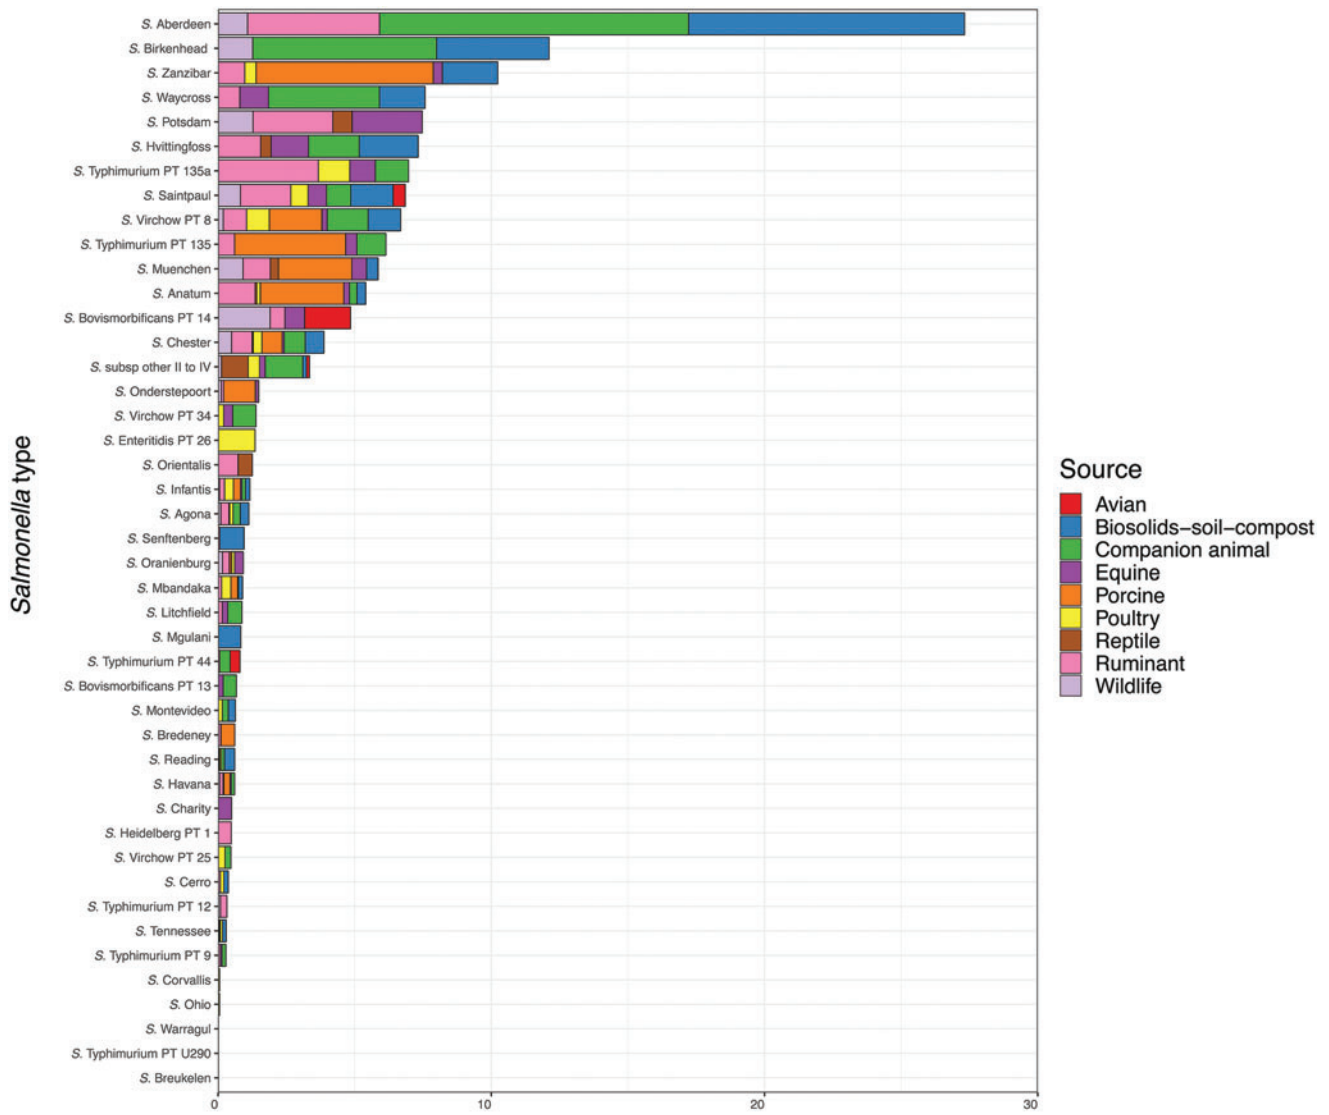

**SUPPLEMENTARY FIG. S4b.** *Salmonella* types isolated from macadamia nuts and attributed to sources for the time period 2003–2007 by the *Salmonella* type and time model (model 2). *Salmonella* types sorted after decreasing mean number with the largest at the top (*Salmonella* Aberdeen).

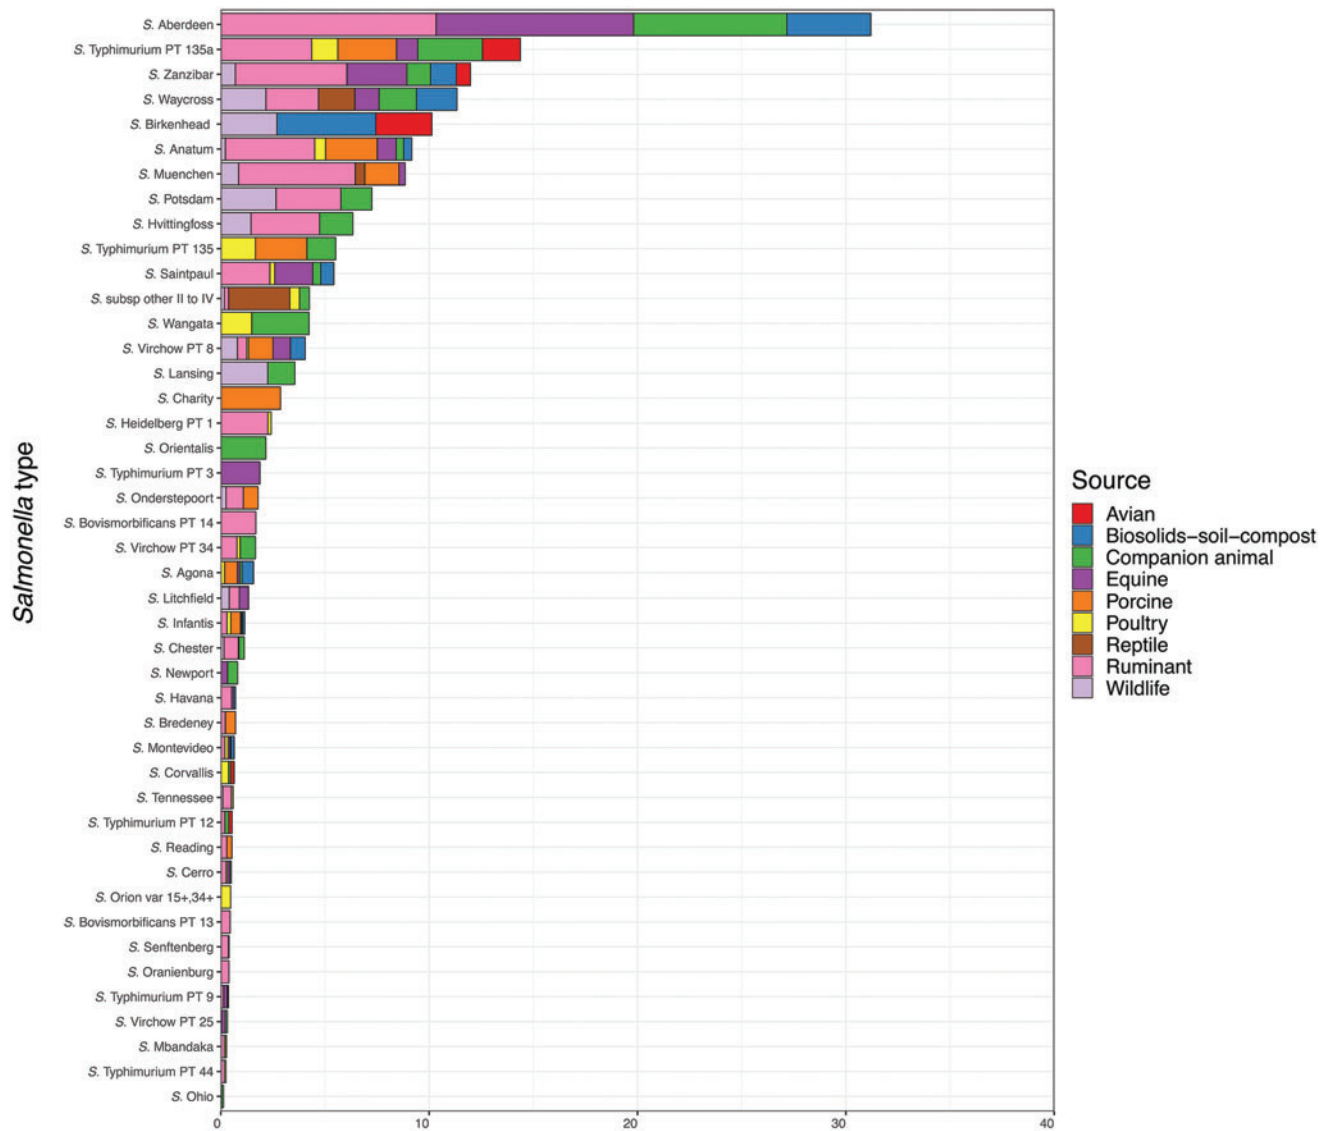

**SUPPLEMENTARY FIG. S4c.** *Salmonella* types isolated from macadamia nuts and attributed to sources for the time period 2008–2012 by the *Salmonella* type and time model (model 2). *Salmonella* types sorted after decreasing mean number with the largest at the top (*Salmonella* Aberdeen).

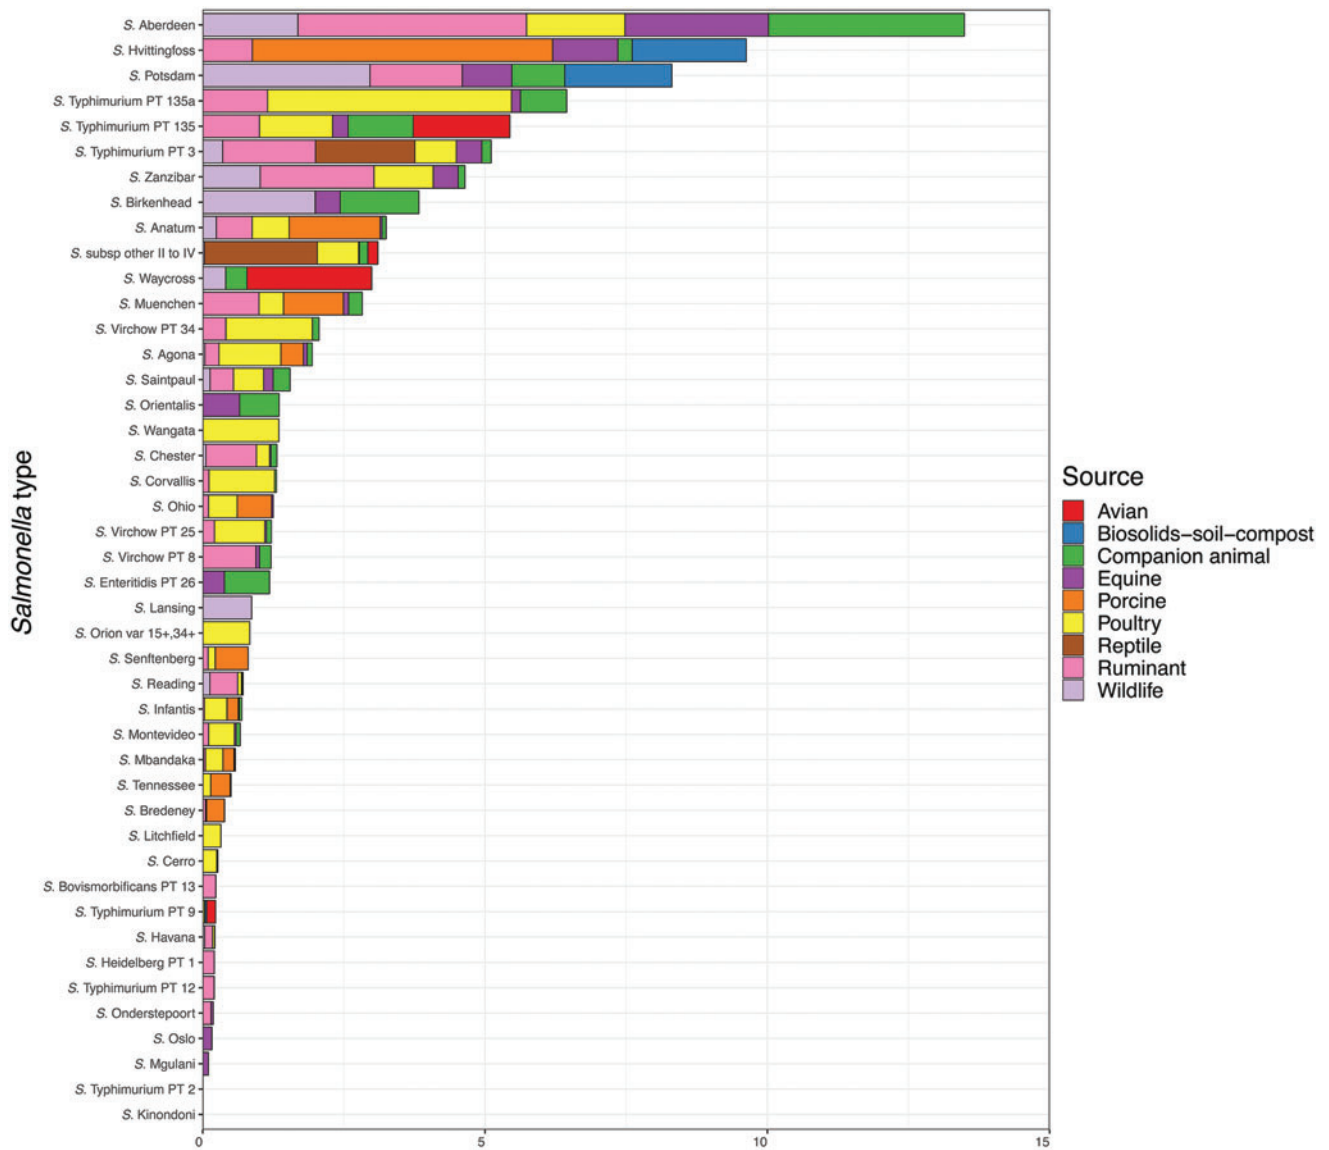

**SUPPLEMENTARY FIG. S4d.** *Salmonella* types isolated from macadamia nuts and attributed to sources for the time period 2013–2017 by the *Salmonella* type and time model (model 2). *Salmonella* types sorted after decreasing mean number with the largest at the top (*Salmonella* Aberdeen).
