# Supplementary material for: Source Attribution of Salmonella in Macadamia Nuts to Animal and Environmental Reservoirs in Queensland, Australia
Source: PubMed Central journal article supplement — Foodborne Pathog Dis. 2020 May 7;17(5):357–64. doi: 10.1089/fpd.2019.2706 (PMC7232652; doi:10.1089/fpd.2019.2706), 2020-05-07
Supplement: Supp_TableS1.pdf [file Supp_TableS1.pdf]

TABLE S1. LIST OF *SALMONELLA* ISOLATES INCLUDED IN EACH SOURCE

| <i>Source category (n total)</i> | <i>Samples in source</i>    |                 |     |
|----------------------------------|-----------------------------|-----------------|-----|
| Avian (30)                       | Avian                       | 19              |     |
|                                  | Bird                        | 3               |     |
|                                  | Bird feces                  | 1               |     |
|                                  | Black-Headed                | 1               |     |
|                                  | Cuckoo Shrike               | 1               |     |
|                                  | Glossy Black                | 1               |     |
|                                  | Honeyeater                  | 1               |     |
|                                  | Lorikeet                    | 1               |     |
|                                  | Parrot                      | 1               |     |
|                                  | Pigeon                      | 1               |     |
|                                  | Biosolids-soil-compost (74) | Biosolids       | 46  |
|                                  |                             | Compost Samples | 1   |
|                                  |                             | Soil            | 27  |
|                                  | Equine (171)                | Equine          | 161 |
| Horse                            |                             | 10              |     |
| Companion animal (238)           | Canine                      | 175             |     |
|                                  | Cat                         | 11              |     |
|                                  | Feline                      | 48              |     |
|                                  | Guinea Pig                  | 2               |     |
|                                  | Stumpy Tailed               | 2               |     |
|                                  | Porcine (71)                | Boar            | 2   |
|                                  |                             | Boar Meat       | 2   |
| Ham                              |                             | 1               |     |
| Pepperoni                        |                             | 1               |     |
| Pig                              |                             | 2               |     |
| Porcine                          |                             | 46              |     |
| Pork (carcass, meal, mince)      |                             | 8               |     |
| Raw Pork                         |                             | 2               |     |
| Wild Boar                        |                             | 6               |     |
| Wild Pig Meat                    |                             | 1               |     |
| Poultry (449)                    |                             | 30 eggs open    | 1   |
|                                  | Breast Fillet               | 1               |     |
|                                  | Chicken                     | 130             |     |
|                                  | Chicken Balls               | 3               |     |
|                                  | Chicken Bird                | 1               |     |
|                                  | Chicken breast              | 6               |     |
|                                  | Chicken Cecum               | 4               |     |
|                                  | Chicken Crumbed             | 1               |     |
|                                  | Chicken feces               | 3               |     |
|                                  | Chicken lasagne             | 2               |     |
|                                  | Chicken Manure              | 1               |     |
|                                  | Chicken Meat                | 10              |     |
|                                  | Chicken Mince               | 4               |     |
|                                  | Chicken Monaco              | 1               |     |
|                                  | Chicken Nuggets             | 9               |     |
|                                  | Chicken Patties             | 1               |     |
|                                  | Chicken Patty               | 2               |     |
|                                  | Chicken pieces              | 1               |     |
|                                  | Chicken Product             | 7               |     |
|                                  | Chicken Raw                 | 9               |     |
|                                  | Chicken rissole             | 1               |     |
|                                  | Chicken Shed                | 8               |     |
|                                  | Chicken Strips              | 1               |     |
|                                  | Chicken thigh               | 5               |     |
|                                  | Chicken Whole               | 2               |     |
|                                  | Chicken Wings               | 2               |     |
|                                  | Chicken/Cheese              | 1               |     |
|                                  | Chook feces                 | 1               |     |
|                                  | Cracked eggs                | 1               |     |
|                                  | Crumbed Chicken             | 1               |     |
|                                  | Egg                         | 61              |     |
|                                  | Farm Chicken                | 1               |     |
|                                  | Hen Meat                    | 4               |     |

(continued)

SUPPLEMENTARY TABLE S1. (CONTINUED)

| <i>Source category (n total)</i> | <i>Samples in source</i> |             |    |
|----------------------------------|--------------------------|-------------|----|
| Reptile (115)                    | Minced Chicken           | 20          |    |
|                                  | Minced hen meat          | 2           |    |
|                                  | Poultry                  | 16          |    |
|                                  | Poultry Meal             | 1           |    |
|                                  | Poultry Meat             | 27          |    |
|                                  | Poultry Mince            | 4           |    |
|                                  | Poultry Minced           | 4           |    |
|                                  | Poultry Raw              | 2           |    |
|                                  | Poultry shed             | 2           |    |
|                                  | Poultry, Minced          | 2           |    |
|                                  | Raw Chicken              | 57          |    |
|                                  | Raw Poultry              | 1           |    |
|                                  | Sample A Hen             | 1           |    |
|                                  | Stockman's Eggs          | 2           |    |
|                                  | Swab Egg Belt            | 2           |    |
|                                  | Whole Bird               | 3           |    |
|                                  | Whole Chicken            | 1           |    |
|                                  | Blue Tongued Lizard      | 5           |    |
|                                  | Carpet Python            | 5           |    |
|                                  | Carpet Taipan            | 1           |    |
|                                  | Coastal Carpet Python    | 1           |    |
|                                  | Diamond Python           | 1           |    |
|                                  | Eastern Bearded Dragon   | 1           |    |
|                                  | Eastern Blue Tong        | 1           |    |
|                                  | Frilled-necked           | 1           |    |
|                                  | Hosmer's Skink           | 1           |    |
|                                  | Iguana                   | 1           |    |
|                                  | Inland Bearded           | 3           |    |
|                                  | Lace Monitor             | 1           |    |
|                                  | Lizard                   | 8           |    |
|                                  | Lizard No. 2             | 2           |    |
|                                  | Olive Python             | 1           |    |
|                                  | Python                   | 23          |    |
|                                  | Reptile                  | 20          |    |
|                                  | Reptile Python           | 1           |    |
|                                  | Saw-Shelled              | 1           |    |
|                                  | Skink                    | 1           |    |
|                                  | Snake                    | 29          |    |
|                                  | Spotted Python           | 1           |    |
|                                  | Stimpson Python          | 1           |    |
|                                  | Taipan                   | 1           |    |
|                                  | Tiger Snake              | 2           |    |
|                                  | Water Python             | 1           |    |
|                                  | Woma Python              | 1           |    |
|                                  | Ruminant (497)           | Beef        | 17 |
|                                  |                          | Beef Blood  | 1  |
|                                  |                          | Beef Burger | 3  |
| Beef Carcass                     |                          | 15          |    |
| Beef Jerky                       |                          | 1           |    |
| Beef Meat                        |                          | 14          |    |
| Beef Product                     |                          | 1           |    |
| Beef Raw                         |                          | 1           |    |
| Beef Trim                        |                          | 2           |    |
| Bovine                           |                          | 160         |    |
| Calf                             |                          | 1           |    |
| Caprine                          |                          | 3           |    |
| Cattle                           |                          | 21          |    |
| Goat                             |                          | 112         |    |
| Goat Carcass                     |                          | 55          |    |
| Goat Meat                        |                          | 29          |    |
| Goat Milk                        |                          | 1           |    |
| Goat Skin                        |                          | 12          |    |
| Goat Skin Off                    |                          | 3           |    |

(continued)

SUPPLEMENTARY TABLE S1. (CONTINUED)

| <i>Source category (n total)</i> | <i>Samples in source</i> |     |
|----------------------------------|--------------------------|-----|
|                                  | Lamb                     | 2   |
|                                  | Lamb Carcass             | 1   |
|                                  | Mutton                   | 9   |
|                                  | Mutton Carcass           | 1   |
|                                  | Ovine                    | 17  |
|                                  | Raw Beef                 | 4   |
|                                  | Raw Beef Meat            | 1   |
|                                  | Raw Goat                 | 1   |
|                                  | Raw Goat Meat            | 1   |
|                                  | Raw Mutton               | 2   |
|                                  | Sheep                    | 5   |
|                                  | Sheep Carcass            | 1   |
| Wildlife (115)                   | Eastern Gray             | 1   |
|                                  | Echidna                  | 1   |
|                                  | Flying Fox               | 1   |
|                                  | Game Meat                | 1   |
|                                  | Kangaroo                 | 44  |
|                                  | Kangaroo Meat            | 20  |
|                                  | Kangaroo Mest            | 1   |
|                                  | Kangaroo Mince           | 4   |
|                                  | Kangaroo Raw             | 1   |
|                                  | Koala                    | 8   |
|                                  | Marsupial                | 4   |
|                                  | Possum                   | 6   |
|                                  | Swamp Wallaby            | 1   |
|                                  | Tree Kangaroo            | 1   |
|                                  | Wallaby                  | 16  |
|                                  | Wallaroo                 | 3   |
|                                  | Wild Dog                 | 2   |
| Macadamia nuts (539)             | Macadamia Nuts           | 539 |
