# Supplementary material for: Source Attribution of Salmonella in Macadamia Nuts to Animal and Environmental Reservoirs in Queensland, Australia
Source: PubMed Central journal article supplement — Foodborne Pathog Dis. 2020 May 7;17(5):357–64. doi: 10.1089/fpd.2019.2706 (PMC7232652; doi:10.1089/fpd.2019.2706), 2020-05-07
Supplement: Supp_TableS2.pdf [file Supp_TableS2.pdf]

Table S2

| "a" factor for sources | Model 2                     |                              |                               |                               |                               |
|------------------------|-----------------------------|------------------------------|-------------------------------|-------------------------------|-------------------------------|
|                        | 1998-2017, mean (95% CrI)   | 1998-2002, mean (95% CrI)    | 2003-2007, mean (95% CrI)     | 2008-2012, mean (95% CrI)     | 2013-2017, mean (95% CrI)     |
| Avian                  | 0.01681 (0.001718-0.05511)  | 0.007285 (0.0002854-0.02232) | 0.00248 (0.00006755-0.009368) | 0.002648 (0.00008226-0.00868) | 0.004736 (0.0004785-0.01289)  |
| Biosolids-soil-compost | 0.2865 (0.1085-0.6793)      | 0.0047 (0.000163-0.01443)    | 0.02169 (0.004453-0.05154)    | 0.00881 (0.000569-0.02317)    | 0.001345 (0.0001657-0.003838) |
| Equine                 | 0.01516 (0.0009437-0.04111) | 0.02173 (0.004506-0.0461)    | 0.007874 (0.0003336-0.02337)  | 0.01492 (0.003967-0.03407)    | 0.003284 (0.000112-0.01022)   |
| Companion animal       | 0.02738 (0.001848-0.06905)  | 0.01025 (0.003525-0.02121)   | 0.02507 (0.004578-0.05302)    | 0.01348 (0.004205-0.02941)    | 0.005924 (0.0003803-0.01509)  |
| Porcine                | 0.01621 (0.0005556-0.04806) | 0.0243 (0.002664-0.06228)    | 0.03576 (0.01072-0.07803)     | 0.02861 (0.007684-0.06897)    | 0.02069 (0.003069-0.05215)    |
| Poultry                | 0.0492 (0.0165-0.09634)     | 0.0401 (0.01705-0.07993)     | 0.01414 (0.001911-0.03887)    | 0.01057 (0.001965-0.02838)    | 0.03153 (0.0117-0.06656)      |
| Reptile                | 0.0299 (0.0006533-0.1245)   | 0.004996 (0.0001506-0.01711) | 0.005833 (0.000152-0.02162)   | 0.01607 (0.001409-0.04669)    | 0.01106 (0.0004904-0.03789)   |
| Ruminant               | 0.009478 (0.0002937-0.0332) | 0.01543 (0.0004974-0.05029)  | 0.02251 (0.004432-0.053)      | 0.05595 (0.02146-0.1141)      | 0.01878 (0.005438-0.04208)    |
| Wildlife               | 0.03806 (0.009539-0.07869)  | 0.006999 (0.0003981-0.01921) | 0.007293 (0.0002835-0.02253)  | 0.00704 (0.0006508-0.01721)   | 0.003878 (0.0006408-0.009499) |

| q [ <i>Salmonella</i> type]  | mean (95% CrI)         |
|------------------------------|------------------------|
| q [S. Aberdeen]              | 62,6 (35,01-92,75)     |
| q [S. Agona]                 | 2,894 (0,9679-6,153)   |
| q [S. Anatum]                | 5,97 (2,678-10,92)     |
| q [S. Birkenhead]            | 74,54 (40,98-98,65)    |
| q [S. Bovismorbificans PT13] | 11,08 (1,857-32,06)    |
| q [S. Bovismorbificans PT14] | 41,38 (14,14-85,44)    |
| q [S. Bredeney]              | 0,6059 (0,06259-1,908) |
| q [S. Breukelen]*            | 0.000413204            |
| q [S. Cerro]                 | 3,081 (0,3339-9,44)    |
| q [S. Charity]               | 30,55 (7,008-78,72)    |
| q [S. Chester]               | 4,221 (1,534-8,549)    |
| q [S. Corvallis]             | 5,104 (0,5225-16,33)   |
| q [S. Enteritidis PT26]      | 64,51 (20,2-98,31)     |
| q [S. Havana]                | 1,316 (0,1434-3,989)   |
| q [S. Heidelberg PT1]        | 9,817 (2,408-24,88)    |
| q [S. Hvittingfoss]          | 40,45 (19,15-70,56)    |
| q [S. Infantis]              | 1,467 (0,345-3,565)    |
| q [S. Kinondoni]*            | 0.010028581            |
| q [S. Lansing]               | 65,45 (26,59-97,93)    |
| q [S. Litchfield]            | 11,65 (2,708-28,7)     |
| q [S. Mbandaka]              | 1,424 (0,2524-3,814)   |
| q [S. Mgulani]               | 18,6 (0,409-75,37)     |
| q [S. Montevideo]            | 2,425 (0,2652-7,263)   |
| q [S. Muenchen]              | 7,833 (3,485-14,37)    |
| q [S. Newport]               | 8,905 (0,2029-36,17)   |
| q [S. Ohio]                  | 4,734 (0,4966-14,67)   |
| q [S. Onderstepoort]         | 6,947 (1,567-17,68)    |
| q [S. Oranienburg]           | 9,675 (1,034-29,53)    |
| q [S. Orientalis]            | 56,65 (22,13-95,62)    |
| q [S. Orion var 15+,34+]     | 31,41 (5,539-80,94)    |
| q [S. Oslo]                  | 29,57 (0,718-91,04)    |
| q [S. Potsdam]               | 74,34 (40,9-98,61)     |
| q [S. Reading]               | 2,388 (0,2529-7,245)   |
| q [S. Saintpaul]             | 9,673 (4,49-17,06)     |
| q [S. Senftenberg]           | 4,501 (0,7876-12,41)   |
| q [S. subsp other II to IV]  | 2,402 (0,8621-5,031)   |
| q [S. Tennessee]             | 2,596 (0,286-7,826)    |
| q [S. Typhimurium PT12]      | 4,813 (0,5262-14,58)   |
| q [S. Typhimurium PT135]     | 23,51 (11,78-39,46)    |
| q [S. Typhimurium PT135a]    | 26,74 (12,97-46,35)    |
| q [S. Typhimurium PT2]*      | 0.006184292            |
| q [S. Typhimurium PT3]       | 26,45 (7,591-62,04)    |
| q [S. Typhimurium PT44]      | 4,363 (0,7071-12,58)   |
| q [S. Typhimurium PT9]       | 1,087 (0,1186-3,296)   |
| q [S. Typhimurium PTU290]    | 0.000826409            |
| q [S. Virchow PT25]          | 4,859 (0,5215-14,84)   |
| q [S. Virchow PT34]          | 19 (6,775-39,34)       |
| q [S. Virchow PT8]           | 11,02 (5,169-19,4)     |
| q [S. Wangata]               | 49,79 (14,87-94,4)     |
| q [S. Warragul]*             | 0.030085744            |
| q [S. Waycross]              | 30,39 (15,58-49,78)    |
| q [S. Zanzibar]              | 19,05 (9,167-32,96)    |
