# Supplementary figures and images for: Source Attribution of Salmonella in Macadamia Nuts to Animal and Environmental Reservoirs in Queensland, Australia
Source: PubMed Central journal article supplement — Foodborne Pathog Dis. 2020 May 7;17(5):357–64. doi: 10.1089/fpd.2019.2706 (PMC7232652; doi:10.1089/fpd.2019.2706), 2020-05-07

## Supplementary Data

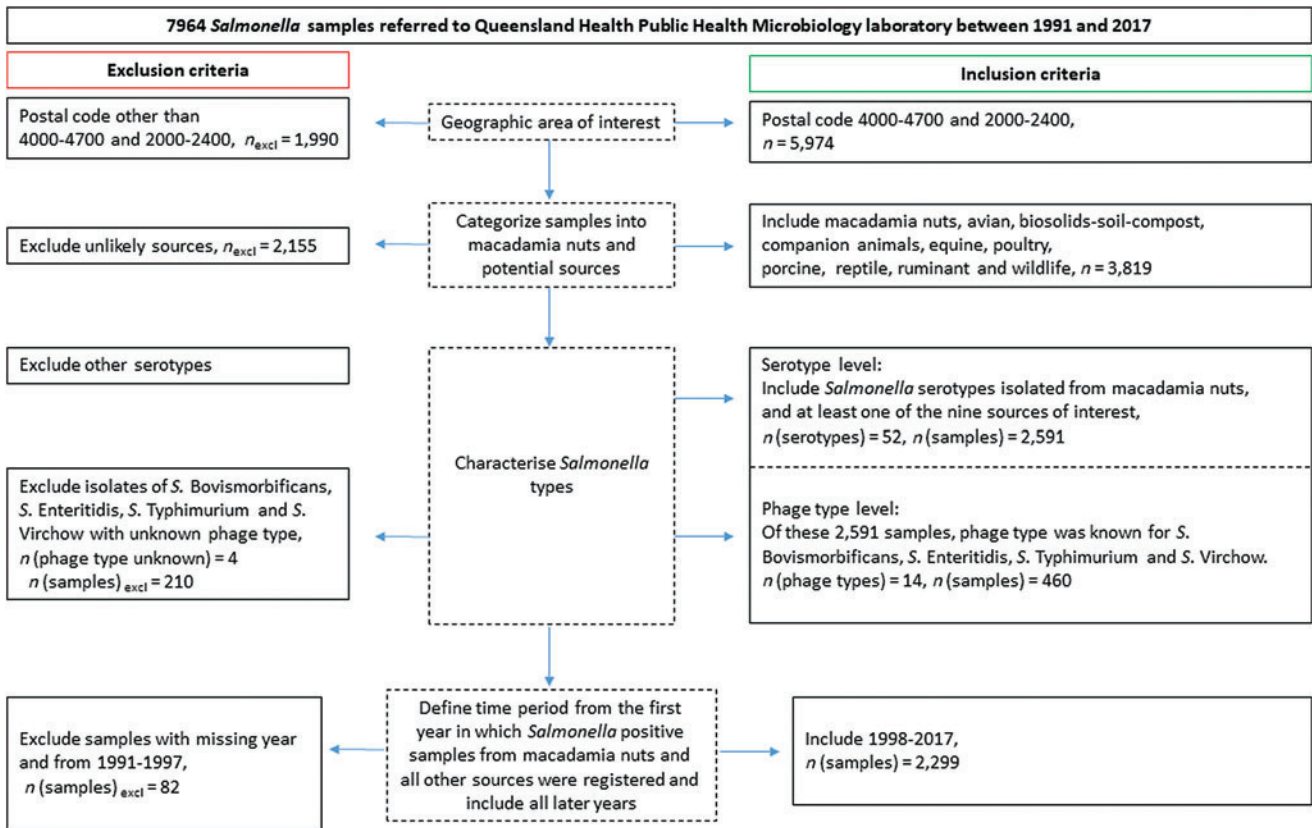

**SUPPLEMENTARY FIG. S1.** Flowchart of data inclusion and exclusion criteria.

Supplement: Supp_FigS1.pdf [file Supp_FigS1.pdf]
